# Supplementary material for: Long delay from symptom onset to first consultation contributes to permanent vision loss in patients with giant cell arteritis: a cohort study
Source: HighWire-hosted journal article supplement (doi:10.1136/rmdopen-2022-002866), 2023-01-01
Supplement: rmdopen-2022-002866supp001_data_supplement.pdf [file rmdopen-2022-002866supp001_data_supplement.pdf]

## Supplementary Material

### **Long delay from symptom onset to first consultation contributes to permanent vision loss in patients with giant cell arteritis: a cohort study**

Andrea K. Hemmig<sup>1\*</sup>, Markus Aschwanden<sup>2\*</sup>, Sabine Seiler<sup>1</sup>, Christoph T. Berger<sup>3,4</sup>, Philipp Köhn<sup>1</sup>, Diego Kyburz<sup>1,4</sup>, Noemi Mensch<sup>1</sup>, Daniel Staub<sup>2</sup>, Mihaela Stegert<sup>1</sup>, Stephan Imfeld<sup>2\*</sup>, Thomas Daikeler<sup>1,3\*</sup>

<sup>1</sup>Department of Rheumatology, University Hospital Basel, Basel, Switzerland

<sup>2</sup>Department of Angiology, University Hospital Basel, Basel, Switzerland

<sup>3</sup>University Center for Immunology, University Hospital Basel, Basel, Switzerland

<sup>4</sup>Department of Biomedicine, University of Basel, Basel, Switzerland

\*These authors contributed equally.

*Correspondence to:*

Thomas Daikeler, MD

Department of Rheumatology, University Hospital Basel, Basel

Petersgraben 4, CH-4031 Basel, Switzerland

Phone: +41 61 265 27 09

Email: Thomas.Daikeler@usb.ch

ORCID: 0000-0003-4894-9613

Table of contents

Vasculitis counts ..... 3

Supplementary Table S1: Number of segments categorized as vasculitis of the common, internal, and external carotid arteries on both sides (total of 6 points) ..... 3

Supplementary Table S2: Number of segments categorized as vasculitis of the subclavian/axillary segment on both sides (total of 2 points) ..... 3

Supplementary Table S3: Characteristics of patients with vision loss during steroid treatment. .... 4

Supplementary Table S4: Characteristics of patients with vision loss before steroid treatment initiation. .... 5

Supplementary case descriptions ..... 7

Supplementary Figure S1:..... 9

## Vasculitis counts

The number of segments categorized as vasculitis for the carotid arteries are shown.

Additionally, we summarized the subclavian and axillary arteries as one segment, resulting in a total vasculitis score of two points per patient.

We only included patients with complete ultrasonographic examinations of the respective segments.

**Supplementary Table S1:** Number of segments categorized as vasculitis of the common, internal, and external carotid arteries on both sides (total of 6 points)

|                                                                   | Without PVL   | With PVL      | p-value |
|-------------------------------------------------------------------|---------------|---------------|---------|
| <b>Number of patients</b>                                         | 223           | 45            | -       |
| <b>Median (IQR)</b>                                               | 0.0 (0.0-0.0) | 0.0 (0.0-0.0) | 0.9701  |
| Abbreviations: IQR=interquartile range; PVL=permanent vision loss |               |               |         |

**Supplementary Table S2:** Number of segments categorized as vasculitis of the subclavian/axillary segment on both sides (total of 2 points)

|                                                                   | Without PVL   | With PVL      | p-value |
|-------------------------------------------------------------------|---------------|---------------|---------|
| <b>Number of patients</b>                                         | 227           | 44            | -       |
| <b>Median (IQR)</b>                                               | 0.0 (0.0-0.0) | 0.0 (0.0-0.0) | 0.7951  |
| Abbreviations: IQR=interquartile range; PVL=permanent vision loss |               |               |         |

**Supplementary Table S3:** Characteristics of patients with vision loss during steroid treatment.

Eleven of 87 patients with visual impairment (12.6%) had not shown any ocular manifestations at first consultation but developed visual impairment after treatment had been commenced, of whom six patients developed PVL.

| Case                                                                                                                                                                                     | Sex | Partial or complete vision loss in at least one eye | First symptoms                                          | Reason for seeking medical advice                                 | Consultation delay (days) | Treatment delay (days) | Starting GC dose (mg) | Timepoint of permanent vision loss in relation to first consultation | GC dose at the time of vision loss (mg) | Time from treatment initiation to vision loss (days) | Ophthalmologic diagnosis                |
|------------------------------------------------------------------------------------------------------------------------------------------------------------------------------------------|-----|-----------------------------------------------------|---------------------------------------------------------|-------------------------------------------------------------------|---------------------------|------------------------|-----------------------|----------------------------------------------------------------------|-----------------------------------------|------------------------------------------------------|-----------------------------------------|
| Patient 44                                                                                                                                                                               | f   | partial                                             | Headache and jaw claudication                           | Headache and jaw claudication                                     | 28                        | 2                      | 60                    | After first consultation                                             | 60                                      | 3                                                    | CVI                                     |
| Patient 45                                                                                                                                                                               | m   | partial                                             | Headache                                                | Headache, weight loss                                             | 0                         | 33                     | 60                    | After first consultation                                             | 10                                      | 141                                                  | AION right eye                          |
| Patient 46                                                                                                                                                                               | f   | complete                                            | Jaw claudication, headache, weight loss                 | Jaw claudication, headache                                        | 2                         | 2                      | 40                    | After first consultation                                             | 5                                       | 15                                                   | CRAO right eye                          |
| Patient 47                                                                                                                                                                               | m   | partial                                             | Neck pain and headache                                  | Neck pain, headache, painful temporal artery and jaw claudication | 7                         | 0                      | 50                    | After first consultation                                             | 15                                      | 37                                                   | CRAO left eye                           |
| Patient 48                                                                                                                                                                               | m   | partial                                             | Fever, deterioration of the patient's general condition | Fever, deterioration of the patient's general condition           | 97                        | 30                     | 60                    | After first consultation                                             | 15                                      | 75                                                   | CRAO right eye                          |
| Patient 49                                                                                                                                                                               | f   | partial                                             | Jaw claudication                                        | Jaw claudication                                                  | 2                         | 0                      | 40                    | After first consultation                                             | 30                                      | 44                                                   | AION left eye, abducens palsy right eye |
| Abbreviations: AION=anterior ischemic optic neuropathy; CRAO=central retinal artery occlusion; f=female; CVI=cerebrovascular insult; GC=glucocorticoid; GP=general practitioner; m=male. |     |                                                     |                                                         |                                                                   |                           |                        |                       |                                                                      |                                         |                                                      |                                         |

**Supplementary Table S4:** Characteristics of patients with vision loss before steroid treatment initiation.

| Case    | Sex | Partial or complete vision loss in at least one eye | First GCA-associated symptoms                                                                 | Reason for seeking medical advice                                                             | Consultation delay (days) | Treatment delay (days) | Place of first consultation    | Timepoint of permanent vision loss | Ophthalmologic diagnosis |
|---------|-----|-----------------------------------------------------|-----------------------------------------------------------------------------------------------|-----------------------------------------------------------------------------------------------|---------------------------|------------------------|--------------------------------|------------------------------------|--------------------------|
| Case 1  | f   | partial                                             | Vision loss right eye                                                                         | Vision loss right eye                                                                         | 1                         | 0                      | Emergency department           | Before first consultation          | AION right eye           |
| Case 2  | f   | complete                                            | Vision loss left eye                                                                          | Vision loss left eye                                                                          | 1                         | 0                      | Eye clinic                     | Before first consultation          | AION left eye            |
| Case 3  | f   | complete                                            | Vision loss right eye                                                                         | Vision loss right eye                                                                         | 3                         | 0                      | Eye clinic                     | Before first consultation          | CRAO right eye           |
| Case 4  | m   | partial                                             | Visual field loss left eye                                                                    | Visual field loss left eye                                                                    | 1                         | 0                      | Eye clinic                     | Before first consultation          | AION left eye            |
| Case 5  | m   | partial                                             | Vision loss left eye                                                                          | Vision loss left eye                                                                          | 2                         | 0                      | GP                             | Before first consultation          | AION left eye            |
| Case 6  | m   | partial                                             | Vision loss left eye                                                                          | Vision loss left eye                                                                          | 2                         | 0                      | GP                             | Before first consultation          | AION left eye            |
| Case 7  | f   | partial                                             | Visual field loss left eye                                                                    | Visual field loss left                                                                        | 1                         | 1                      | Other                          | Before first consultation          | AION left eye            |
| Case 8  | f   | partial                                             | Vision loss and blurred vision on both sides                                                  | Vision loss and blurred vision on both sides                                                  | 2                         | 2                      | Private ophthalmology practice | Before first consultation          | AION on both sides       |
| Case 9  | m   | partial                                             | Vision loss left eye                                                                          | Vision loss left eye                                                                          | 5                         | 1                      | Private ophthalmology practice | Before first consultation          | CRAO left eye            |
| Case 10 | m   | partial                                             | Vision loss left eye                                                                          | Vision loss left eye                                                                          | 3                         | 11                     | Private ophthalmology practice | Before first consultation          | AION left eye            |
| Case 11 | m   | partial                                             | Visual field loss left eye                                                                    | Visual field loss left eye                                                                    | 3                         | 0                      | Private ophthalmology practice | Before steroid therapy             | AION left eye            |
| Case 12 | m   | partial                                             | Visual field loss on both sides                                                               | Visual field loss on both sides                                                               | 15                        | 0                      | Private ophthalmology practice | Before first consultation          | PION on both sides       |
| Case 13 | f   | partial                                             | Visual field loss on both sides, painful temporal artery, jaw claudication                    | Visual field loss on both sides, painful temporal artery, jaw claudication                    | 1                         | 0                      | Eye clinic                     | Before first consultation          | AION on both sides       |
| Case 14 | m   | partial                                             | Visual field loss, headache, scalp tenderness, jaw claudication, weight loss and night sweats | Visual field loss, headache, scalp tenderness, jaw claudication, weight loss and night sweats | NA                        | NA                     | Eye clinic                     | Before first consultation          | AION on both sides       |
| Case 15 | f   | complete                                            | Vision loss left, headache, jaw claudication                                                  | Vision loss left, headache, jaw claudication                                                  | NA                        | NA                     | GP                             | Before first consultation          | AION left eye            |
| Case 16 | f   | complete                                            | Vision loss right eye, blurred vision left eye, jaw pain                                      | Vision loss right eye, blurred vision left eye, jaw pain                                      | 3                         | 0                      | GP                             | Before first consultation          | AION on both sides       |
| Case 17 | f   | complete                                            | Vision loss left eye, headache                                                                | Vision loss left eye, headache                                                                | 2                         | 0                      | Private ophthalmology practice | Before first consultation          | NA                       |
| Case 18 | m   | partial                                             | Vision loss right eye, followed by jaw claudication                                           | Vision loss right eye and jaw claudication                                                    | 14                        | 0                      | Private ophthalmology practice | Before first consultation          | AION right eye           |
| Case 19 | f   | partial                                             | Visual field loss right eye, headache                                                         | Visual field loss right eye and headache                                                      | 3                         | 0                      | Private ophthalmology practice | Before first consultation          | AION right eye           |
| Case 20 | f   | partial                                             | Headache                                                                                      | Vision loss right eye                                                                         | 31                        | 0                      | Emergency department           | Before first consultation          | AION right eye           |
| Case 21 | f   | complete                                            | Neck pain and headache                                                                        | Vision loss left eye                                                                          | 31                        | 0                      | Emergency department           | Before first consultation          | CRAO left eye            |
| Case 22 | f   | complete                                            | Headache                                                                                      | Vision loss right eye                                                                         | 19                        | 1                      | Eye clinic                     | Before first consultation          | AION right eye           |
| Case 23 | m   | partial                                             | Headache                                                                                      | Vision loss left eye                                                                          | 6                         | 0                      | Eye clinic                     | Before first consultation          | AION left eye            |
| Case 24 | f   | partial                                             | Headache                                                                                      | Visual field loss right eye                                                                   | 22                        | 0                      | Eye clinic                     | Before first consultation          | AION right eye           |

| Case                                                                                                                                                                                                                                                                                                                               | Sex | Partial or complete vision loss in at least one eye | First GCA-associated symptoms                                                   | Reason for seeking medical advice                          | Consultation delay (days) | Treatment delay (days) | Place of first consultation    | Timepoint of permanent vision loss | Ophthalmologic diagnosis      |
|------------------------------------------------------------------------------------------------------------------------------------------------------------------------------------------------------------------------------------------------------------------------------------------------------------------------------------|-----|-----------------------------------------------------|---------------------------------------------------------------------------------|------------------------------------------------------------|---------------------------|------------------------|--------------------------------|------------------------------------|-------------------------------|
| Case 25                                                                                                                                                                                                                                                                                                                            | m   | complete                                            | Headache, jaw claudication and scalp tenderness                                 | Vision loss right eye, visual field loss left eye          | 9                         | 0                      | Eye clinic                     | Before first consultation          | AION on both sides            |
| Case 26                                                                                                                                                                                                                                                                                                                            | m   | partial                                             | Jaw claudication                                                                | Visual field loss left eye                                 | 13                        | 1                      | Eye clinic                     | Before first consultation          | AION left eye                 |
| Case 27                                                                                                                                                                                                                                                                                                                            | m   | complete                                            | Jaw claudication followed by hip pain and headache                              | Vision loss and blurred vision on both sides               | 23                        | 0                      | Eye clinic                     | Before first consultation          | AION on both sides            |
| Case 28                                                                                                                                                                                                                                                                                                                            | f   | partial                                             | Neck pain and headache                                                          | Blurred vision left eye                                    | 59                        | 1                      | Eye clinic                     | Before first consultation          | AION left eye                 |
| Case 29                                                                                                                                                                                                                                                                                                                            | M   | partial                                             | Neck pain followed by jaw claudication and headache                             | Visual field loss left eye                                 | 15                        | 0                      | Eye clinic                     | Before first consultation          | AION left eye                 |
| Case 30                                                                                                                                                                                                                                                                                                                            | F   | partial                                             | Night sweats, weight loss                                                       | Blurred vision right eye                                   | 14                        | 0                      | Eye clinic                     | Before first consultation          | AION right eye                |
| Case 31                                                                                                                                                                                                                                                                                                                            | M   | partial                                             | Shoulder and neck pain followed by jaw claudication and scalp tenderness        | Visual field loss on both sides                            | 92                        | 0                      | Eye clinic                     | Before first consultation          | AION on both sides            |
| Case 32                                                                                                                                                                                                                                                                                                                            | M   | partial                                             | Jaw claudication, deterioration of the patient's general condition, weight loss | Visual field loss                                          | 30                        | 1                      | GP                             | Before steroid therapy             | AION right eye                |
| Case 33                                                                                                                                                                                                                                                                                                                            | F   | complete                                            | Neck pain, jaw claudication                                                     | Vision loss left eye                                       | 25                        | 0                      | GP                             | Before first consultation          | AION left eye                 |
| Case 34                                                                                                                                                                                                                                                                                                                            | F   | complete                                            | Headache, weight loss                                                           | Vision loss on both sides                                  | 416                       | 0                      | Private ophthalmology practice | Before first consultation          | CRAO left eye, AION right eye |
| Case 35                                                                                                                                                                                                                                                                                                                            | F   | partial                                             | Neck pain and headache                                                          | Visual field loss left eye                                 | 21                        | 1                      | Private ophthalmology practice | Before first consultation          | CRAO left eye                 |
| Case 36                                                                                                                                                                                                                                                                                                                            | F   | partial                                             | Night sweats                                                                    | Blurred vision left eye                                    | 196                       | 7                      | Private ophthalmology practice | Before first consultation          | AION left eye                 |
| Case 37                                                                                                                                                                                                                                                                                                                            | F   | complete                                            | Scalp tenderness, jaw claudication, pain in the temporal artery                 | Vision loss left eye                                       | 19                        | 0                      | Private ophthalmology practice | Before first consultation          | AION right eye                |
| Case 38                                                                                                                                                                                                                                                                                                                            | f   | partial                                             | Shoulder and neck pain                                                          | Blurred vision left eye                                    | 21                        | 3                      | Private ophthalmology practice | Before first consultation          | AION left eye                 |
| Case 39                                                                                                                                                                                                                                                                                                                            | m   | partial                                             | Amaurosis fugax right eye                                                       | Amaurosis fugax right eye                                  | 0                         | 49                     | Different hospital             | After first consultation           | AION right eye                |
| Case 40                                                                                                                                                                                                                                                                                                                            | f   | partial                                             | Headache, jaw claudication                                                      | Headache, jaw claudication                                 | 18                        | 10                     | Different hospital             | After first consultation           | AION right eye                |
| Case 41                                                                                                                                                                                                                                                                                                                            | m   | complete                                            | Headache                                                                        | Headache, deterioration of the patient's general condition | 21                        | 11                     | GP                             | After first consultation           | AION left eye                 |
| Case 42                                                                                                                                                                                                                                                                                                                            | f   | complete                                            | Headache and jaw claudication                                                   | Headache, jaw claudication, fever                          | 10                        | 3                      | GP                             | After first consultation           | AION right eye                |
| Case 43                                                                                                                                                                                                                                                                                                                            | m   | partial                                             | Headache, fever, weight loss                                                    | Headache, fever, weight loss                               | 35                        | 11                     | GP                             | After first consultation           | CRAO right eye                |
| Consultation delay=time from GCA symptom onset to first consultation; treatment delay=time from first consultation to treatment initiation.<br>Abbreviations: AION=anterior ischemic optic neuropathy; CRAO=central retinal artery occlusion; f=female; GP=general practitioner; m=male; PION=posterior ischemic optic neuropathy. |     |                                                     |                                                                                 |                                                            |                           |                        |                                |                                    |                               |

### Supplementary case descriptions

Five of 43 patients who suffered from vision loss before steroid initiation were shown to have sought medical advice in advance, when visual symptoms were not yet present. These five cases illustrate the difficulty in diagnosing giant cell arteritis (GCA), which was not recognized in these cases until after the onset of irreversible visual disturbances.

#### *Case 39 (Table 3)*

A patient with a previous history of polymyalgia rheumatica had suffered from a single episode of amaurosis fugax in the right eye, whereupon the patient presented at the same day as symptom onset. Extensive examinations including cerebrovascular imaging were performed and excluded intracranial hemorrhage, stroke, or tumor. An ultrasonography examination showed no evidence of GCA. Due to inconclusive results, no steroid treatment was initiated. Weeks later, the patient self-referred and reported a two-week history of progressively decreasing vision in the right eye and concomitant weight loss. At presentation, the patient suffered from visual field loss and fundoscopy revealed optic disc edema. Ultrasonography showed new vasculitic changes in the temporal artery on both sides.

#### *Case 40 (Table 3)*

A patient presented with severe new-onset headache and jaw pain. Cerebral imaging was not conducted; however, it was not possible to determine from the medical records which examinations were performed. Steroid treatment, however, was not initiated. Nine days later, the patient suffered from sudden vision loss and presented directly at the emergency department of our clinic. Bedside ultrasonography showed positive compression signs on both sides of the frontal temporal artery and the ophthalmologic examination revealed optic disc edema and temporal visual field loss. High-dose glucocorticoid treatment was promptly initiated, however, visual field loss remained irreversible.

#### *Case 41 (Table 3)*

A patient was referred to a hospital by his GP due to deterioration of the patient's health and new-onset headache. Laboratory results revealed an elevated C-reactive protein and leukocytosis. A thoracic CT scan revealed pneumonia, which was treated with antibiotics. In the further course, the patient developed sudden visual disturbances in his left eye up to complete vision loss. Steroid treatment was started, and the patient was referred to our clinic for further diagnostics.

*Case 42 (Table 3)*

A patient first suffered from jaw claudication and intermittent headache. During that time, the patient consulted a dentist due to persistent jaw pain. Since the dental examination remained inconclusive, no therapy was initiated. However, on the same day, the patient consulted her general practitioner (GP) due to headache and new onset fever. Additionally, the patient reported abdominal pain which prompted her GP to refer the patient to the emergency department. Due to the unspecific nature of the symptoms with predominant constipation, an abdominal infection was excluded and empiric antibiotic therapy was initiated on admission. In the further course, the patient developed painful temporal arteries and acute amaurosis on her right eye. An emergency ophthalmological, neurological and rheumatological evaluation was performed and due to suspected anterior ischemic optic neuropathy (AION) and GCA, high-dose intravenous steroid treatment was started immediately. Unfortunately, complete blindness persisted in the right eye.

*Case 43 (Table 3)*

A patient consulted his GP complaining of headache, fatigue, loss of appetite, night sweats as well as weight loss for over a period of one month. His GP initiated an antibiotic therapy which did not improve the patient's symptoms and a thoracic CT scan remained inconclusive. After a couple of days, the patient experienced a sudden episode of transient blurred vision in both eyes and subsequent complete blindness in his right eye. He consulted a private ophthalmologist, who referred him immediately with suspicion of GCA.



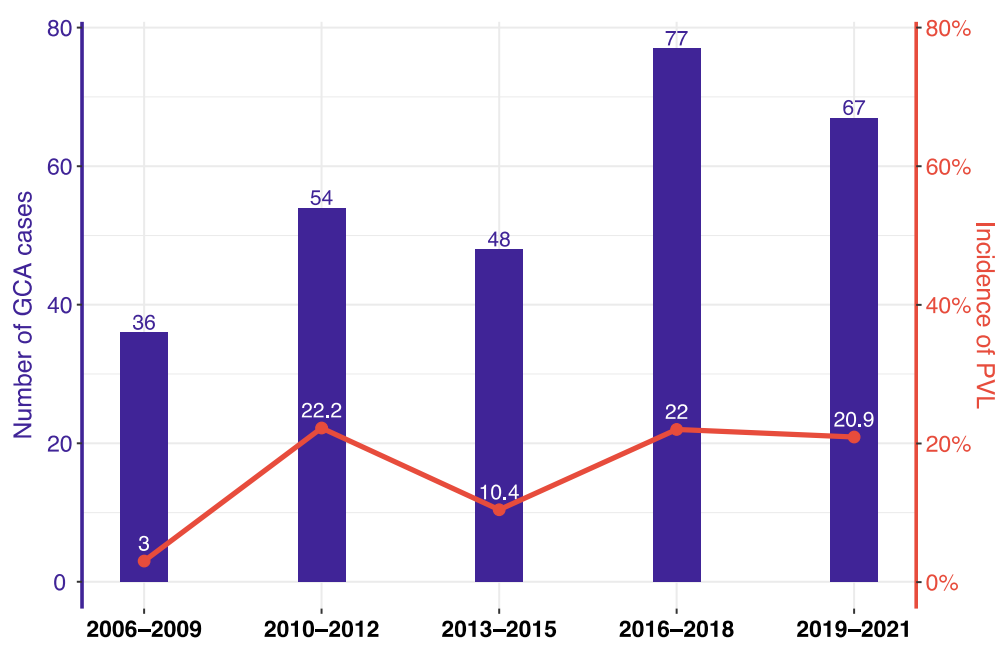

**Supplementary Figure S1:**  
Number of patients diagnosed with giant cell arteritis at the University Hospital Basel from December 2006 to May 2021. The line indicates the trend in incidence (%) of permanent vision loss (PVL) over the last 15 years.
